# Supplementary material for: Does peatland rewetting mitigate flooding from extreme rainfall events?
Source: Copernicus journal article supplement (doi:10.5194/hess-29-2599-2025), 2025-06-19
Supplement: Supplementary file 1 [file hess-29-2599-2025-supplement.pdf]

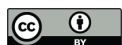

*Supplement of*

## **Does peatland rewetting mitigate flooding from extreme rainfall events?**

**Shirin Karimi et al.**

*Correspondence to:* Virginia Mosquera ([virginia.mosquera@slu.se](mailto:virginia.mosquera@slu.se))

The copyright of individual parts of the supplement might differ from the article licence.

## Supplementary information

*Table S1. Characteristics of the four rainfall-runoff events shown in Figure 4 for the rewetted (R1 and R2) and control sites during the pre- and post-rewetting years.*

| Site                   | Total rain<br>(mm) | Peak flow<br>(mm h <sup>-1</sup> ) | Antecedent GWL<br>(mm) |
|------------------------|--------------------|------------------------------------|------------------------|
| Pre-rewetting          |                    |                                    |                        |
|                        | 37                 |                                    |                        |
| Control                |                    | 0.29                               | -15                    |
| R1                     |                    | 0.93                               | -82                    |
| R2                     |                    | 0.54                               | -102                   |
| 1 year post-rewetting  |                    |                                    |                        |
|                        | 63                 |                                    |                        |
| Control                |                    | 0.27                               | -35                    |
| R1                     |                    | 0.71                               | -24                    |
| R2                     |                    | 0.29                               | -85                    |
| 2-years post-rewetting |                    |                                    |                        |
|                        | 53                 |                                    |                        |
| Control                |                    | 0.22                               | -47                    |
| R1                     |                    | 0.61                               | -34                    |
| R2                     |                    | 0.37                               | -57                    |
| 3-years post-rewetting |                    |                                    |                        |
|                        | 69                 |                                    |                        |
| Control                |                    | 0.26                               | -19                    |
| R1                     |                    | 0.14                               | -5.1                   |
| R2                     |                    | 0.12                               | -40                    |
